# Supplementary material for: Signature of low-dimensional quasi-F centers in zirconium-rich electrides
Source: Royal Society of Chemistry journal article supplement (doi:10.1039/d4mh00437j), 2024-01-01
Supplement: d4mh00437j1.pdf [file d4mh00437j1.pdf]

## Signature of low dimensional quasi-F center in zirconium rich electriles

Dinesh Thapa,<sup>‡a</sup> Shambhu Bhandari Sharma,<sup>b</sup> Dario Alfè,<sup>b,c,d</sup> Dmitri Kilin,<sup>a</sup> and Svetlana Kilina<sup>a</sup>

<sup>a</sup> Department of Chemistry and Biochemistry, North Dakota State University, ND 58105, USA

<sup>b</sup> Department of Earth Sciences, University College London, Gower Street, London WC1E 6BT, United Kingdom

<sup>c</sup> London Centre for Nanotechnology, University College London, London WC1E 6BT, United Kingdom and

<sup>d</sup> Dipartimento di Fisica Ettore Pancini, Università di Napoli Federico II, Monte S. Angelo, I-80126  
Napoli, Italy

<sup>‡</sup>To whom correspondence should be addressed: [dinesh.thapa@ndsu.edu](mailto:dinesh.thapa@ndsu.edu)

### Supplementary Information

**Table I.** Position coordinates (Wyckoff positions) of the interstitial anionic electrons (IAE) or quasi-F centers denoted by symbol E for Zr<sub>2</sub>O (space group, *P312*).

| IAE | Wyckoff positions      | Average volume of Bader basin (Å <sup>3</sup> ) |
|-----|------------------------|-------------------------------------------------|
| E1  | 0.6667, 0.6664, 0.8500 | 10.6354                                         |
| E2  | 0.0085, 0.3326, 0.8500 |                                                 |
| E3  | 0.3241, 0.9915, 0.8500 |                                                 |
| E4  | 0.3241, 0.3326, 0.6700 |                                                 |
| E5  | 0.0085, 0.6759, 0.6700 |                                                 |
| E6  | 0.6674, 0.9915, 0.6700 |                                                 |
| E7  | 0.6667, 0.6664, 0.3500 |                                                 |
| E8  | 0.0085, 0.3326, 0.3500 |                                                 |
| E9  | 0.3241, 0.9915, 0.3500 |                                                 |
| E10 | 0.3336, 0.3333, 0.1500 |                                                 |
| E11 | 0.0085, 0.6759, 0.1500 |                                                 |
| E12 | 0.6674, 0.9915, 0.1500 |                                                 |

**Table II.** Position coordinates (Wyckoff positions) of the interstitial anionic electrons (IAE) or quasi-F centers denoted by symbol E for Zr<sub>2</sub>Se (space group, *Pnmm*).

| IAE | Wyckoff positions      | Average volume of Bader basin (Å <sup>3</sup> ) |
|-----|------------------------|-------------------------------------------------|
| E1  | 1.0000, 0.6200, 0.9600 | 11.8550                                         |
| E2  | 1.0000, 0.0308, 0.9000 |                                                 |
| E3  | 1.0000, 0.9700, 0.6200 |                                                 |
| E4  | 1.0000, 0.5850, 0.4850 |                                                 |
| E5  | 1.0000, 0.0300, 0.3800 |                                                 |
| E6  | 1.0000, 0.9692, 0.1102 |                                                 |
| E7  | 1.0000, 0.3800, 0.0350 |                                                 |
| E8  | 1.0000, 0.4200, 0.5100 |                                                 |
| E9  | 0.5000, 0.4700, 0.8800 |                                                 |
| E10 | 0.5000, 0.1200, 0.5400 |                                                 |
| E11 | 0.5000, 0.5308, 0.6102 |                                                 |
| E12 | 0.5000, 0.8800, 0.4600 |                                                 |
| E13 | 0.5000, 0.4692, 0.3898 |                                                 |
| E14 | 0.5000, 0.5350, 0.1200 |                                                 |

**Table III.** Position coordinates (Wyckoff positions) of the interstitial anionic electrons (IAE) or quasi-F centers denoted by symbol E for Zr<sub>2</sub>Te (space group, *Pnma*).

| IAE | Wyckoff positions      | Average volume of Bader basin (Å <sup>3</sup> ) |
|-----|------------------------|-------------------------------------------------|
| E1  | 0.7500, 0.7000, 0.7150 | 11.2352                                         |
| E2  | 0.7500, 0.0400, 0.6090 |                                                 |
| E3  | 0.7500, 0.9200, 0.5100 |                                                 |
| E4  | 0.7500, 0.8000, 0.2100 |                                                 |
| E5  | 0.7500, 0.4650, 0.1100 |                                                 |
| E6  | 0.7500, 0.5700, 0.0000 |                                                 |
| E7  | 0.2500, 0.4200, 1.000  |                                                 |
| E8  | 0.2500, 0.5350, 0.8900 |                                                 |
| E9  | 0.2500, 0.2000, 0.7900 |                                                 |
| E10 | 0.2500, 0.0800, 0.4820 |                                                 |
| E11 | 0.2500, 0.9600, 0.3900 |                                                 |
| E12 | 0.2500, 0.3000, 0.2850 |                                                 |
| E13 | 0.7500, 0.1200, 0.3550 |                                                 |
| E14 | 0.2500, 0.8900, 0.6500 |                                                 |
| E15 | 0.7500, 0.3900, 0.8550 |                                                 |
| E16 | 0.2500, 0.6100, 0.1400 |                                                 |

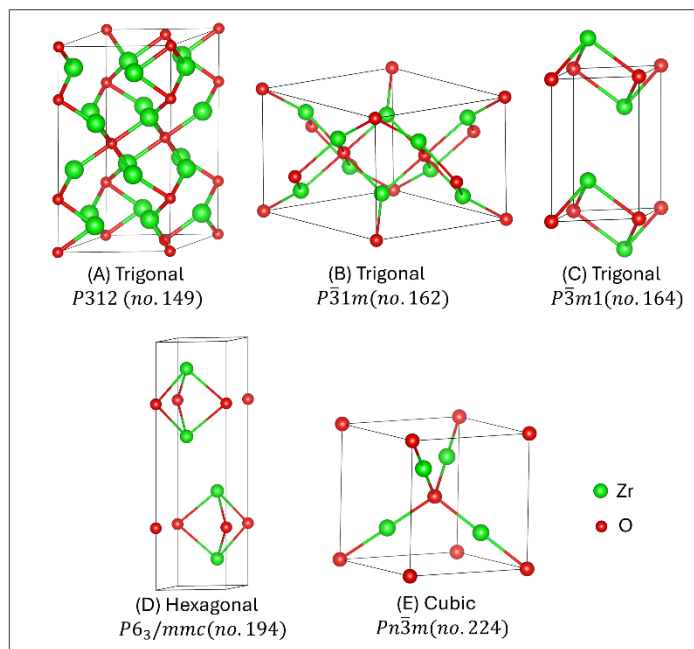

**Fig. S1.** Diagram representing relaxed unit cell structures of five different phases of  $Zr_2O$ .

**Table III.** Lattice parameters ( $a$ ,  $b$ ,  $c$ ), and formation enthalpy ( $\Delta H$ ) for five different phases of  $Zr_2O$  using PBE functional. The numbers in blue color in the bracket alongside are the previously reported calculated values using the same PBE functional.

| Space group                        | $a=b(\text{\AA})$           | $c(\text{\AA})$             | $\Delta H$ (eV/atom)                                  |
|------------------------------------|-----------------------------|-----------------------------|-------------------------------------------------------|
| <i>P312</i> (no.149)               | 5.660                       | 10.476                      | -1.810                                                |
| <i>P31m</i> (no.162)               | 5.594, (5.654) <sup>a</sup> | 5.185, (5.248) <sup>a</sup> | -1.772, (-1.780) <sup>a</sup>                         |
| <i>P3m1</i> (no.164)               | 3.294                       | 5.183                       | -1.767                                                |
| <i>P6<sub>3</sub>/mmc</i> (no.194) | 3.211                       | 11.035                      | -1.610                                                |
| <i>Pn3m</i> (no.224)               | 4.854, (4.854) <sup>b</sup> | 4.854, (4.854) <sup>b</sup> | -1.604, (-1.546) <sup>a</sup> , (-1.605) <sup>b</sup> |

<sup>a</sup>

<sup>b</sup>

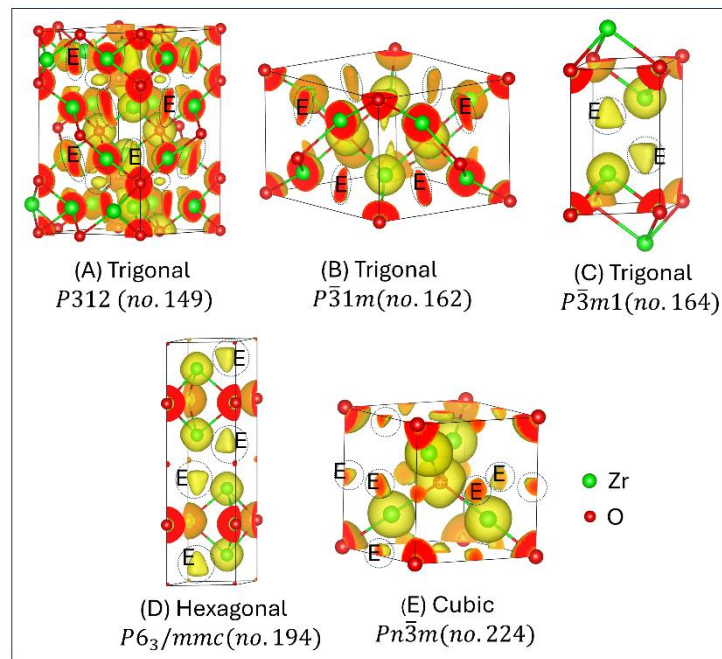

**Fig. S2.** Diagram representing 3D iso-surface plots of electron localization function (ELF) in five different phases of  $Zr_2O$  with iso-surface value 0.6. The symbol E in the diagrams represents the positions of IAEs in the unit cell.

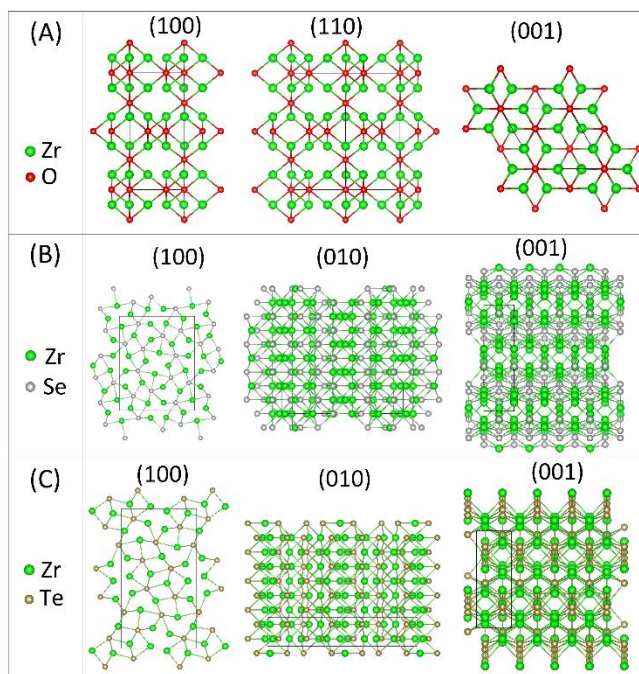

**Fig. S3.** Relaxed geometrical structures of (a)  $Zr_2O$  (space group,  $P312$ ), (b)  $Zr_2Se$  (space group,  $Pnm$ ), and (c)  $Zr_2Te$  (space group,  $Pnma$ ) viewing through planes specified in the diagram.

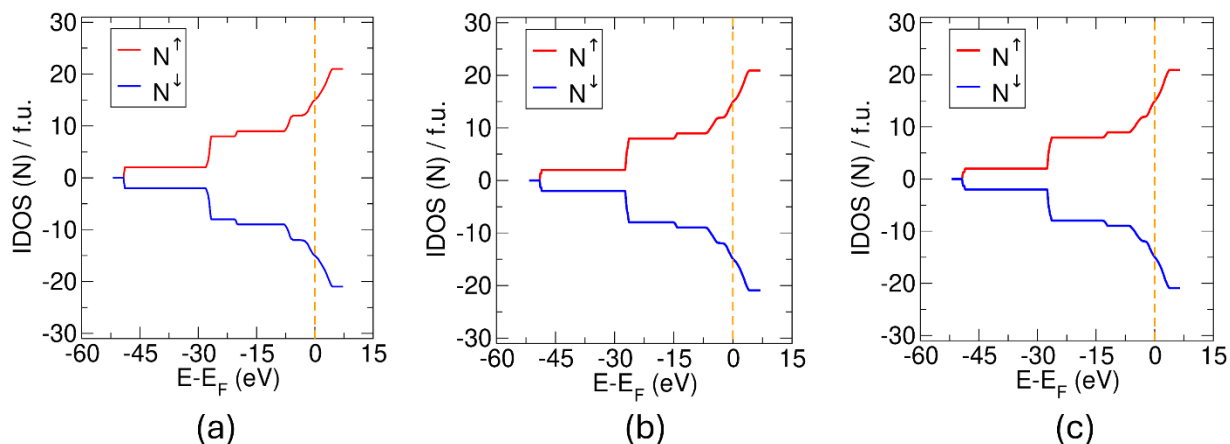

**Fig. S4.** Total integrated density of states (IDOS) per formula unit (f.u.) showing number of spin up ( $N^\uparrow$ ) and spin down ( $N_\downarrow$ ) electrons in (a)  $Zr_2O$  (space group,  $P312$ ), (b)  $Zr_2Se$  (space group,  $Pnnm$ ), and (c)  $Zr_2Te$  (space group,  $Pnma$ ). The dashed vertical line in orange color at 0.0 eV represents the Fermi energy ( $E_F$ ).

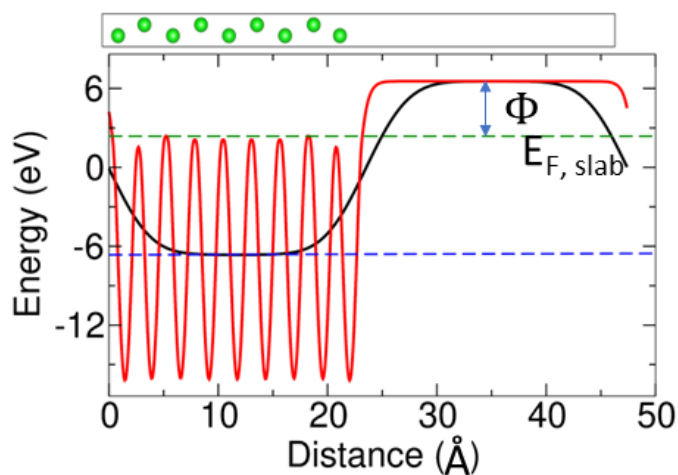

**Fig. S5.** Work function ( $\Phi$ ) calculation in the most stable phase ( $P6_3/mmc$ , no. 194) of zirconium (Zr) metal along (001) plane. Here, the red and black solid lines represent macroscopic and planar average respectively. The dashed horizontal blue line represents average electrostatic potential in the interior of the slab ( $V_{\text{slab, interior}}$ ). The dashed horizontal green line represents Fermi energy of the slab ( $E_{F, \text{slab}}$ ).

## References

- (1) Zhang, J.; Oganov, A. R.; Li, X.; Dong, H.; Zeng, Q. Novel Compounds in the Zr–O System, Their Crystal Structures and Mechanical Properties. *Phys. Chem. Chem. Phys.* **2015**, *17* (26), 17301–17310.
- (2) Jin, G.; Xu, C.; Hu, S.; Zhou, X. Temperature Dependent Electrochemical Equilibrium Diagram of Zirconium-Water System Studied with Density Functional Theory and Experimental Thermodynamic Data. *J. Nucl. Mater.* **2020**, *532*, 152036.
